# Supplementary material for: Growth of axial nested P–N heterojunction nanowires for high performance diodes
Source: Royal Society of Chemistry journal article supplement (doi:10.1039/c4cp04397a), 2014-11-25
Supplement: c4cp04397a1.pdf [file c4cp04397a1.pdf]

## **Growth of Axial Nested P-N Heterojunction Nanowires for High Performance Diode**

Nan Chen, Zheng Xue, Hui Yang, Zhou Zhang, Juan Gao, Yongjun Li, Huibiao Liu\*

CAS Key Laboratory of Organic Solids, Beijing National Laboratory for Molecular Sciences (BNLMS), Institute of Chemistry, Chinese Academy of Sciences, Beijing, 100190, People's Republic of China

E-mail: liuhb@iccas.ac.cn

**Supporting Information.**

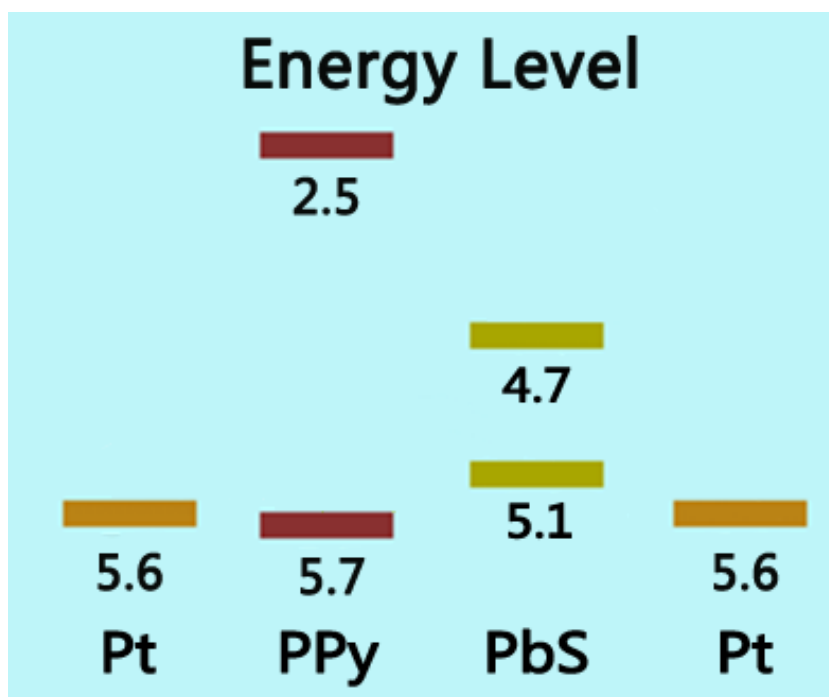

**Figure S1.** Energy level diagram of PbS and PPy (eV).

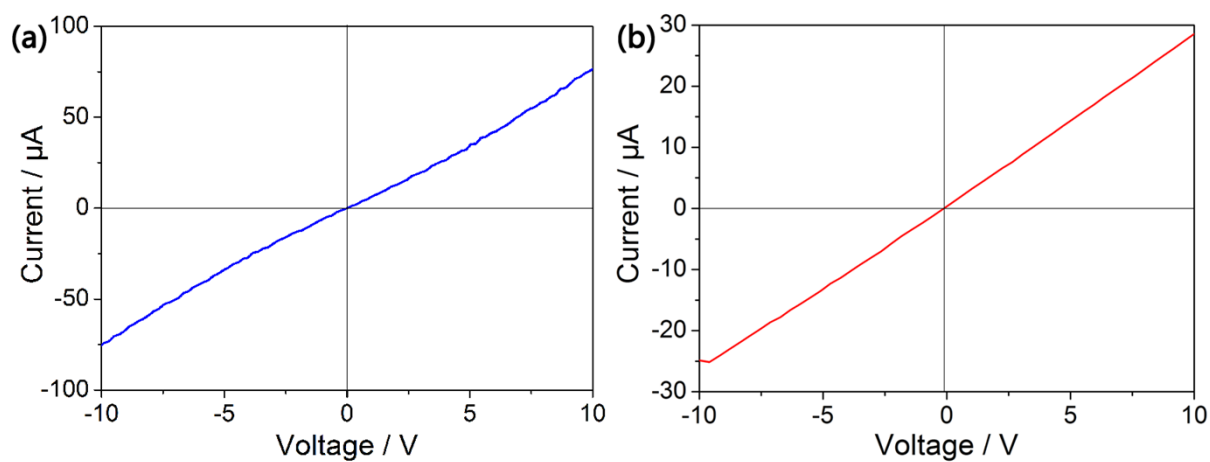

**Figure S2.** I-V curves of PbS (a) and PPy (b) nanowire devices.
